# Supplementary material
Source: PubMed Central journal article supplement (PMC5007553)

## **APPENDIX**

### **Autophagosome-Lysosome Fusion in Neurons Requires INPP5E, A Protein Associated with Joubert Syndrome**

Junya Hasegawa<sup>1,2</sup>, Ryo Iwamoto<sup>1</sup>, Takanobu Otomo<sup>2</sup>, Akiko Nezu<sup>2</sup>, Maho Hamasaki<sup>1,2</sup>  
and Tamotsu Yoshimori<sup>1,2</sup>

<sup>1</sup>Laboratory of Intracellular Membrane Dynamics, Graduate School of Frontier

Biosciences, Osaka University, Osaka, Japan, <sup>2</sup>Department of Genetics, Graduate

School of Medicine, Osaka University, Osaka, Japan

#### **Appendix Table of Contents:**

Appendix Figure Legends

Appendix Figures S1 – S14

## **Appendix Figure Legends**

### **Appendix Figure S1. siRNA screening to identify phosphoinositide phosphatases involved in autophagy.**

HeLa cells treated with siRNAs against the indicated phosphatases for 48 h were cultured in Earle's Balanced Salt Solution (EBSS) for 2 h. Cells were fixed and stained with anti-LC3 and anti-p62 antibodies, and then analyzed by immunofluorescence microscopy. Bar, 10  $\mu$ m. Red text indicates phosphatases that affect autophagy.

### **Appendix Figure S2. INPP5E knockdown partially suppresses autophagic flux in MEFs.**

**A** Levels of *INPP5E* mRNA 72 h after transfection of MEFs with siControl or siINPP5Es, as analyzed by RT-PCR.

**B** MEFs treated with siControl or siINPP5Es were cultured for 2 h in growth medium (nutrient) or EBSS (starved) with or without 125 nM Baf.A1, and then analyzed by immunoblot using anti-LC3 and anti-GAPDH antibodies.

**C** Quantitation of protein signal intensities from immunoblots in B showing difference

of LC3-II levels between the presence and absence of Baf.A1 following normalization to the control protein GAPDH. Results represent means  $\pm$  s.d. of three independent experiments. \*\*,  $P < 0.01$ .

**Appendix Figure S3. The number of LC3 dots, as well as Atg5 dots, is elevated in INPP5E-depleted MEFs.**

A MEFs stably expressing GFP-Atg5 treated with siControl or siINPP5Es were cultured for 2 h in growth medium (nutrient) or EBSS (starved). Cells were fixed and stained with anti-LC3 antibodies, and then analyzed by immunofluorescence microscopy. Bar, 10  $\mu$ m.

**B, C** Quantitation of the number of LC3 puncta (B) or Atg5 puncta (C) per cell, as described in A (mean  $\pm$  s.d.;  $n > 40$  cells from three independent experiments).

Starvation medium (S) with 100 nM wortmannin (W) was used as a negative control.

\*\*,  $P < 0.01$ .

**Appendix Figure S4. INPP5E depletion decreases the ratio of autolysosomes to**

**autophagosomes.**

**A** N1E-115 cells stably expressing tfLC3 treated with siControl or siINPP5Es were cultured in growth medium. Cells were fixed and analyzed by immunofluorescence microscopy. Bar, 10  $\mu$ m.

**B** Percentages of colocalization are shown as RFP<sup>+</sup>GFP<sup>+</sup> dots / total (RFP<sup>+</sup>GFP<sup>-</sup>) dots (means  $\pm$  s.d.; n > 20 cells from three independent experiments). \*\*, P < 0.01.

**Appendix Figure S5. Autophagy is suppressed in Atg2a/2b-depleted N1E-115 cells.**

**A** Levels of *Atg2a* and *Atg2b* mRNA 72 h after transfection of N1E-115 cells with siControl or siAtg2a/2b, as analyzed by RT-PCR.

**B** N1E-115 cells treated with siControl or siAtg2a/2b were cultured for 2 h in growth medium with or without 125 nM Baf.A1, and then analyzed by immunoblot using anti-p62, anti-LC3, and anti-GAPDH antibodies.

**Appendix Figure S6. INPP5E knockdown does not affect transcriptional level of autophagy-related genes.**

Transcriptional levels of the indicated genes 72 h after transfection of N1E-115 cells with siControl or siINPP5Es, as analyzed by quantitative real-time PCR. Data were normalized to  $\beta$ -actin and analyzed by the  $2^{-\Delta\Delta Ct}$  method. \*,  $P < 0.05$ ; n.s., non significant.

**Appendix Figure S7. Autophagy induction dose not affect INPP5E localization in N1E-115 cells and MEFs.**

**A** N1E-115 cells stably expressing mSt-INPP5E (WT) were cultured in growth medium with or without 200 nM Torin1. Cells were fixed and stained with anti-LAMP1 antibodies, and then analyzed by immunofluorescence microscopy. Insets show the boxed areas at high magnification. Bar, 10  $\mu$ m.

**B** MEFs stably expressing mSt-INPP5E (WT) were cultured for 2 h in growth medium (nutrient) or EBSS (starved). Cells were fixed and stained with anti-LAMP1 antibodies, and then analyzed by immunofluorescence microscopy. Insets show the boxed areas at high magnification. Arrowhead indicates the cilia formation and the localization of INPP5E at cilia. Bar, 10  $\mu$ m.

**Appendix Figure S8. INPP5E depletion does not decrease intralysosomal pH.**

N1E-115 cells treated with siControl or siINPP5Es were cultured for 1 h in growth medium with 1  $\mu$ M Lysosensor Yellow/Blue DND-160. Cells were fixed and stained with anti-LAMP1 antibodies and analyzed by immunofluorescence microscopy.

Quantitation of signal intensity ratio (yellow / blue) (mean  $\pm$  s.d.; n > 20 cells from three independent experiments). n.s., non significant.

**Appendix Figure S9. Lysosomal glycosidase activity is unchanged in INPP5E-depleted N1E-115 cells.**

Activities of lysosomal enzymes were measured in N1E-115 cells treated with siControl or siINPP5Es. Measurements of the activities of the indicated glycosidases represent means  $\pm$  s.d. of three independent experiments. \*\*, P < 0.01; \*, P < 0.05; n.s., non significant.

**Appendix Figure S10. ML1N probe binds specifically to PI(3,5)P<sub>2</sub> on lysosomes.**

**A** N1E-115 cells stably expressing mSt-2xML1N were cultured in growth medium treated with siControl or siPIKfyve, or with 1  $\mu$ M YM201636 for 2 h. Cells were fixed and stained with anti-LAMP1 antibodies, and then analyzed by immunofluorescence microscopy. Insets show the boxed areas at high magnification. Bar, 10  $\mu$ m.

**B** Quantitation of signal intensities in A showing mSt-2xML1N colocalizing with LAMP1 (means  $\pm$  s.d.; n > 30 cells from three independent experiments). \*\*, P < 0.01.

**Appendix Figure S11. INPP5E acts as 5-phosphatase against PI(3,5)P<sub>2</sub> and PI(4,5)P<sub>2</sub> *in vitro*.**

Activities of INPP5E 5-phosphatase were measured in HEK293A cells transfected with empty vector or FLAG-INPP5E (WT, D477N). Measurements of the activities against the indicated phosphoinositides represent means  $\pm$  s.d. of three independent experiments. \*\*, P < 0.01; \*, P < 0.05.

**Appendix Figure S12. Lysosomal PI(4)P level is unchanged in INPP5E-depleted N1E-115 cells.**

**A** NIE-115 cells stably expressing OSBP-PH-mCherry treated with siControl or siINPP5Es were cultured in growth medium. Cells were fixed and stained with anti-LAMP1 antibodies, and then analyzed by immunofluorescence microscopy. Insets show the boxed areas at high magnification. Bar, 10  $\mu$ m.

**B** Quantitation of signal intensities in A showing OSBP-PH-mCherry colocalizing with LAMP1 (means  $\pm$  s.d.; n > 100 cells from three independent experiments). n.s., non significant.

**Appendix Figure S13. Double knockdown of PIKfyve and INPP5E abolished lysosomal PI(3,5)P<sub>2</sub> staining and showed accumulation of LC3 dots.**

**A** NIE-115 cells stably expressing mSt-2xML1N were cultured in growth medium treated with siControl or siINPP5E plus siPIKfyve. Cells were fixed and stained with anti-LAMP1 antibodies, and then analyzed by immunofluorescence microscopy. Insets show the boxed areas at high magnification. Bar, 10  $\mu$ m.

**B** NIE-115 cells treated with siControl, siINPP5E, siPIKfyve, or siINPP5E plus siPIKfyve were cultured in growth medium. Cells were fixed and stained with anti-LC3



antibodies, and then analyzed by immunofluorescence microscopy. Insets show the boxed areas at high magnification. Bar, 10  $\mu$ m.

**Appendix Figure S14. Localization of cortactin on lysosomes is reduced in INPP5E-depleted N1E-115 cells.**

**A** N1E-115 cells treated with siControl or siINPP5Es were cultured in growth medium. Cells were fixed and stained with anti-LAMP1, anti-cortactin antibodies and Phalloidin, and then analyzed by immunofluorescence microscopy. Insets show the boxed areas at high magnification. Bar, 10  $\mu$ m. Quantitation of signal intensities showing cortactin colocalizing with LAMP1 (means  $\pm$  s.d.; n > 40 cells from three independent experiments). \*\*, P < 0.01; \*, P < 0.05.

**B** N1E-115 cells treated with siControl or siINPP5Es were cultured in growth medium. Cells were fixed and stained with anti-phospho-Y466 cortactin and anti-LAMP1 antibodies, and then analyzed by immunofluorescence microscopy. Insets show the boxed areas at high magnification. Bar, 10  $\mu$ m. Quantitation of signal intensities

showing cortactin (pY466) colocalizing with LAMP1 (means  $\pm$  s.d.; n > 40 cells from three independent experiments). \*\*, P < 0.01; \*, P < 0.05.

Appendix Figure S1

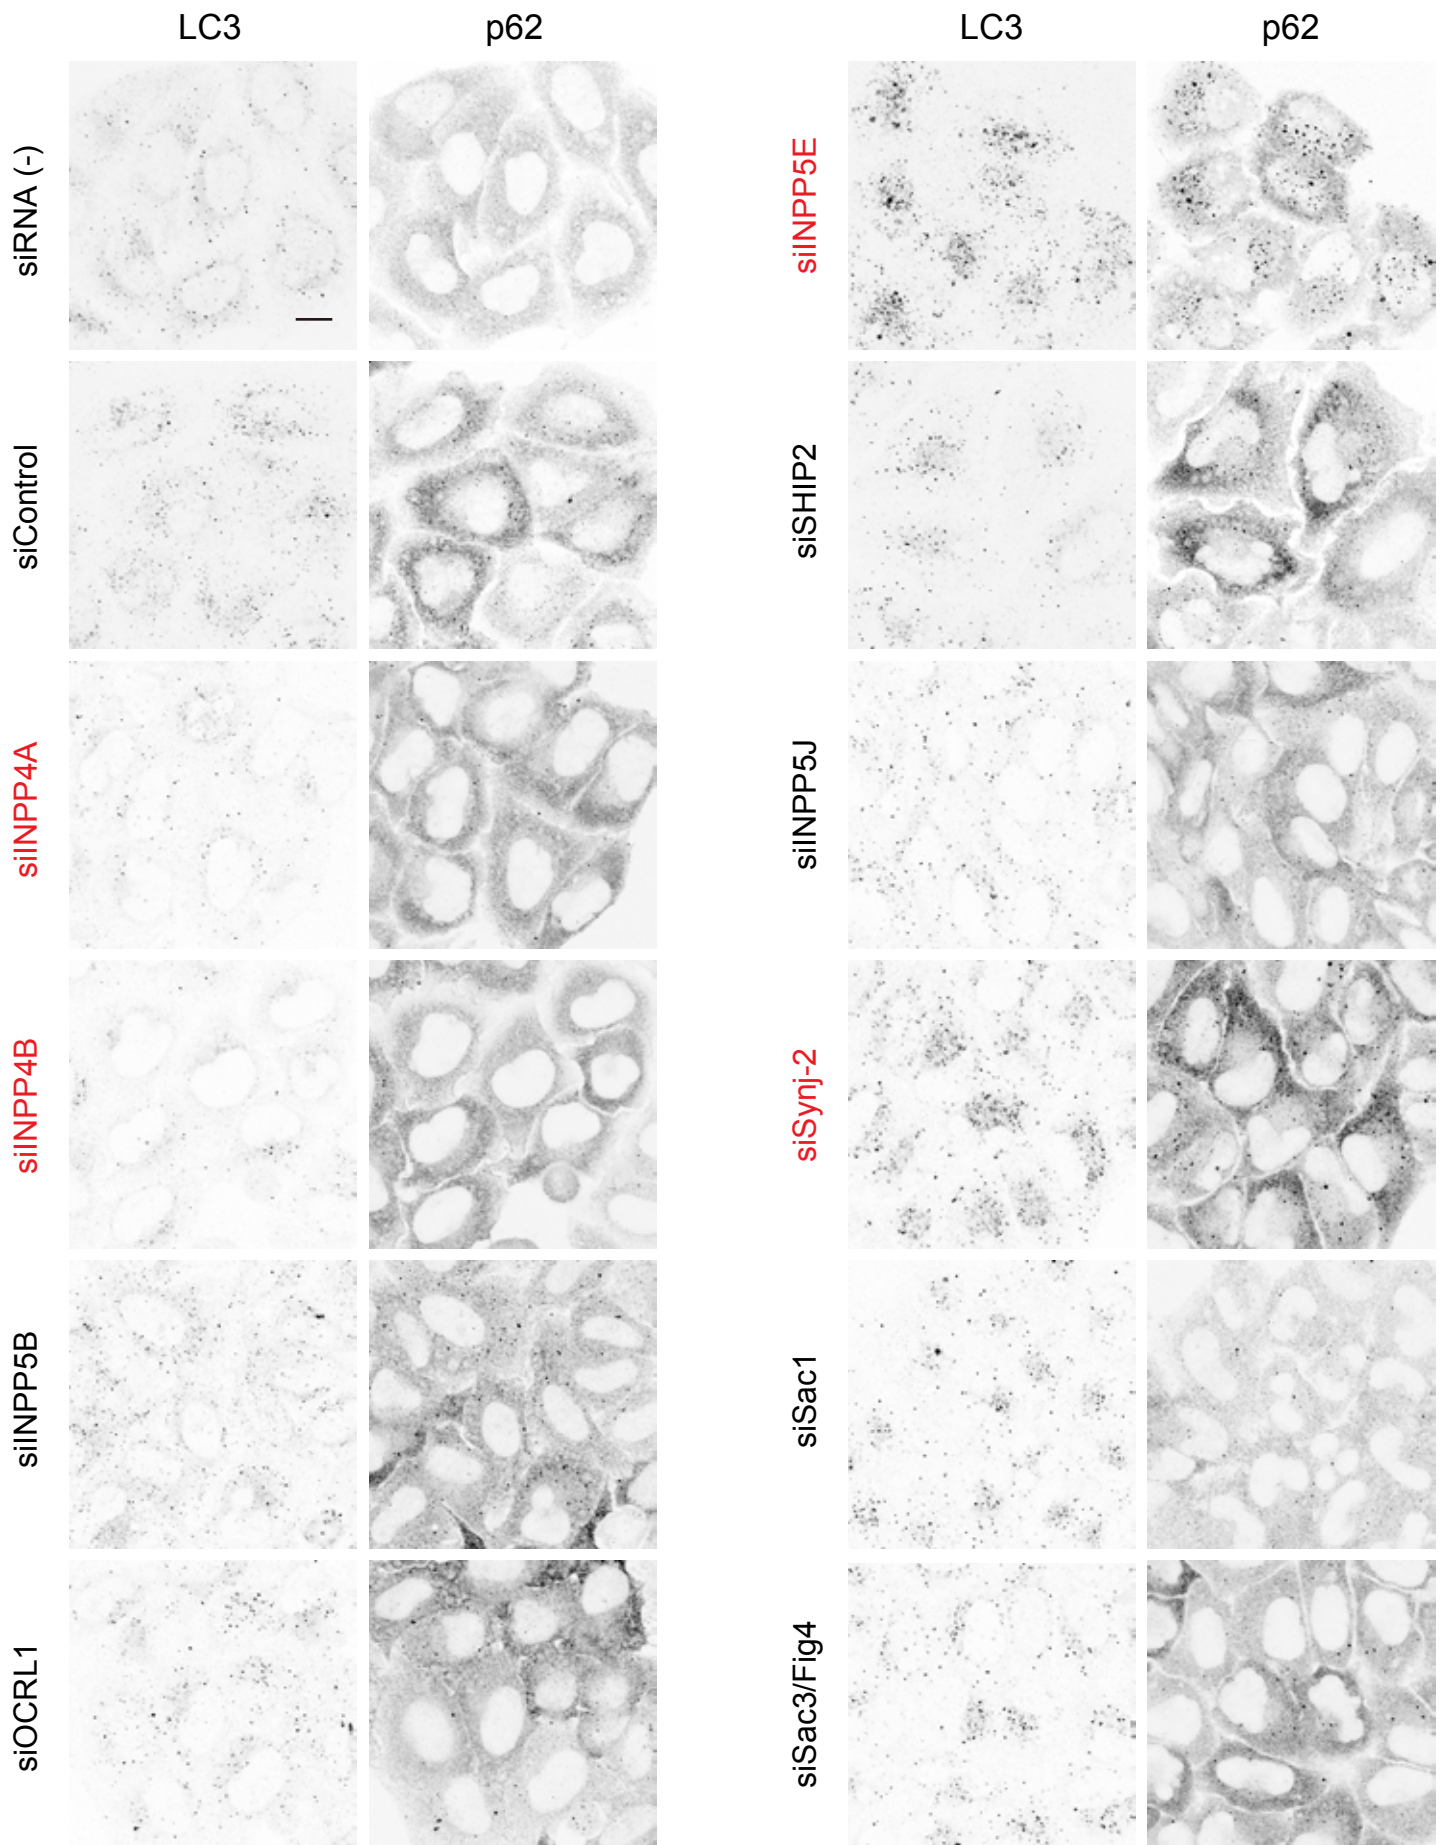

# Appendix Figure S2

A

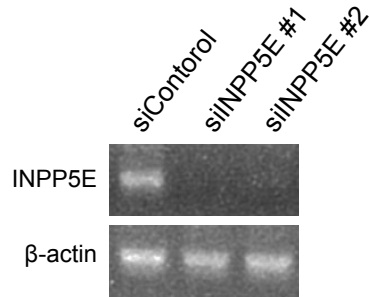

B

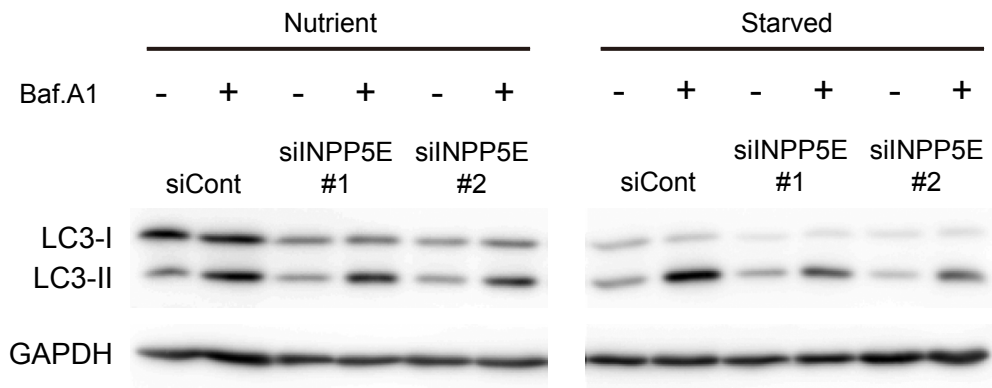

C

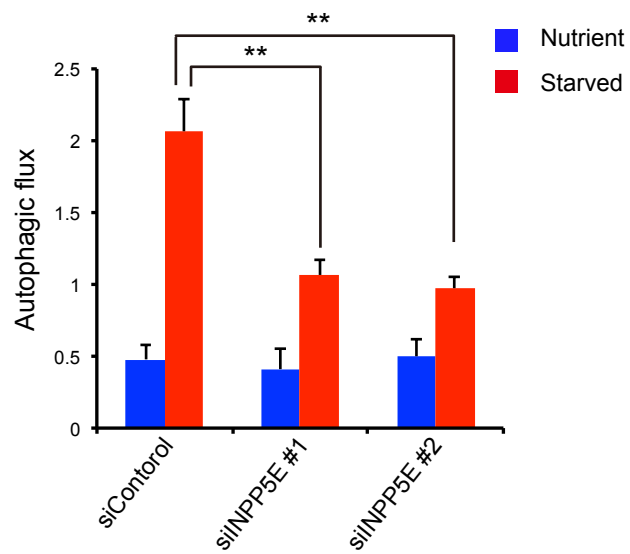

# Appendix Figure S3

**A**

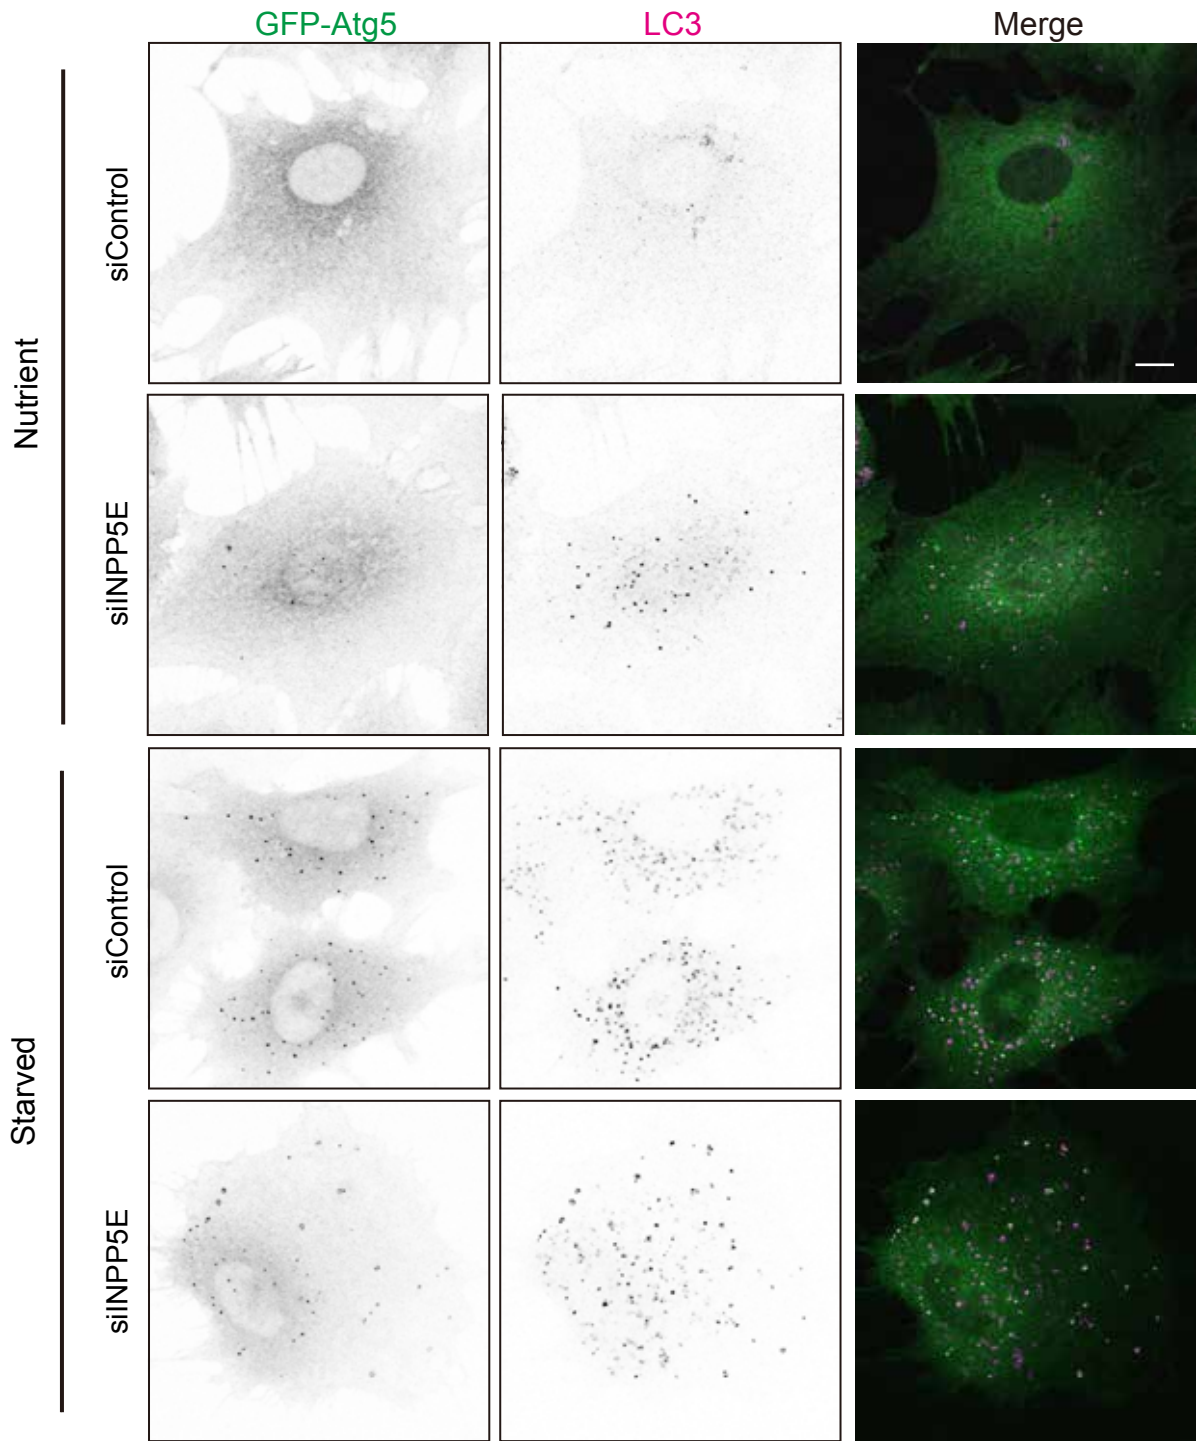

**B**

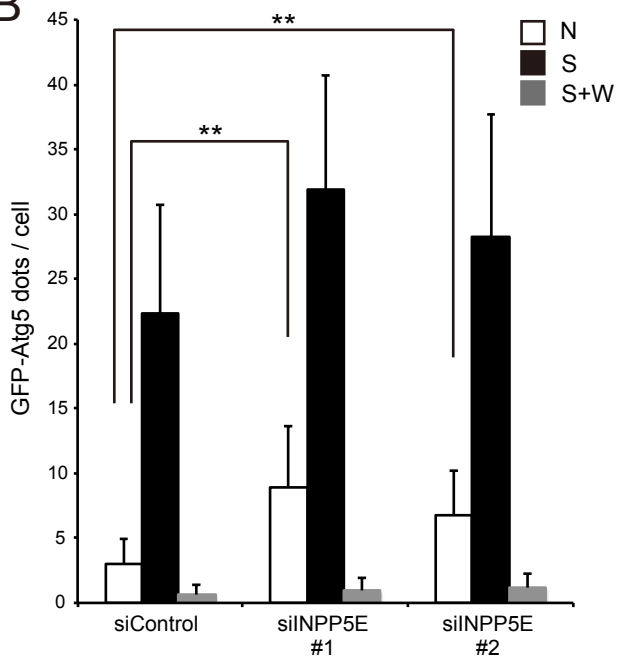

**C**

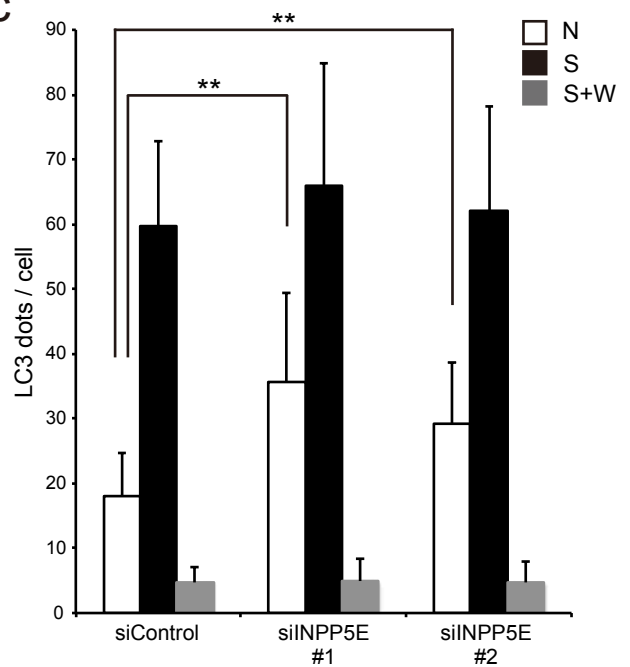

# Appendix Figure S4

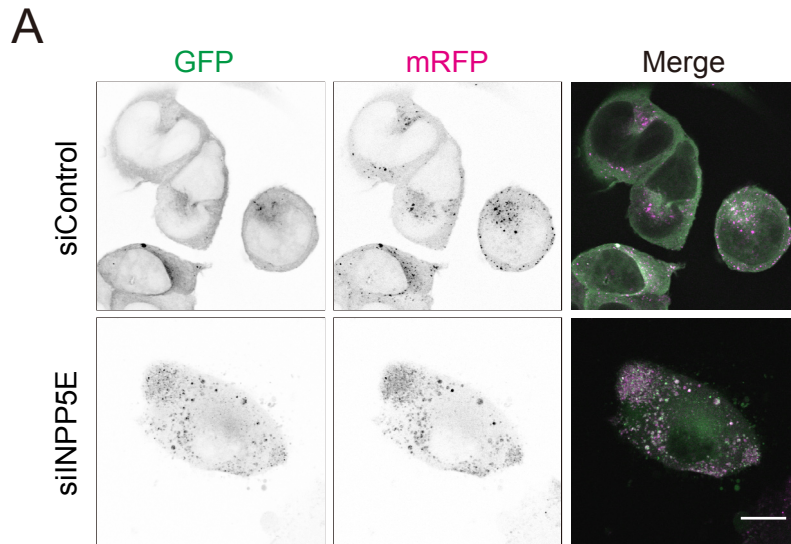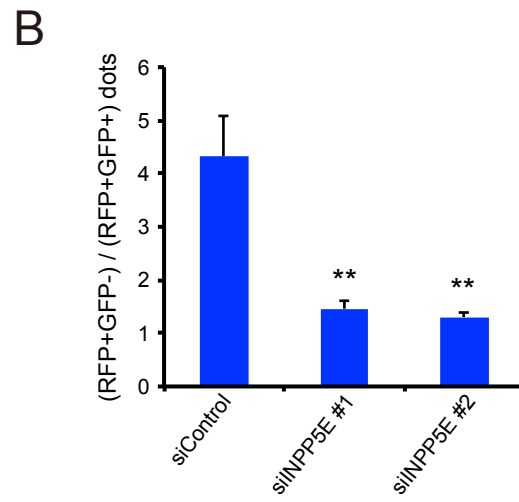

# Appendix Figure S5

## A

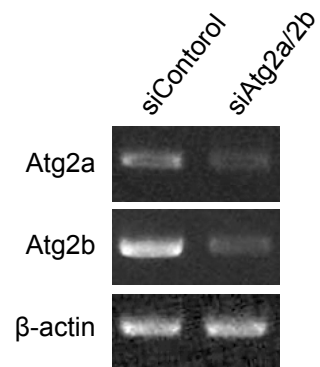

## B

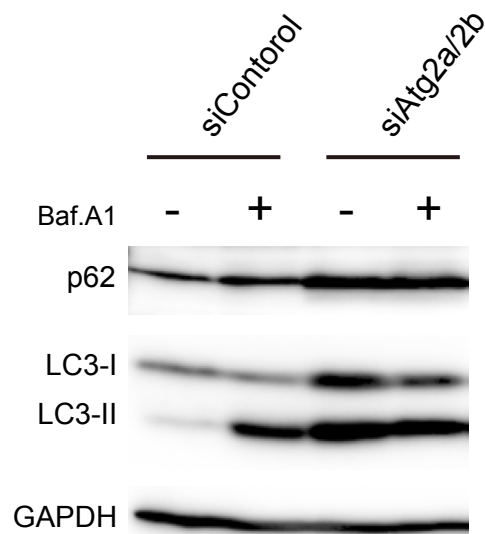

Appendix Figure S6

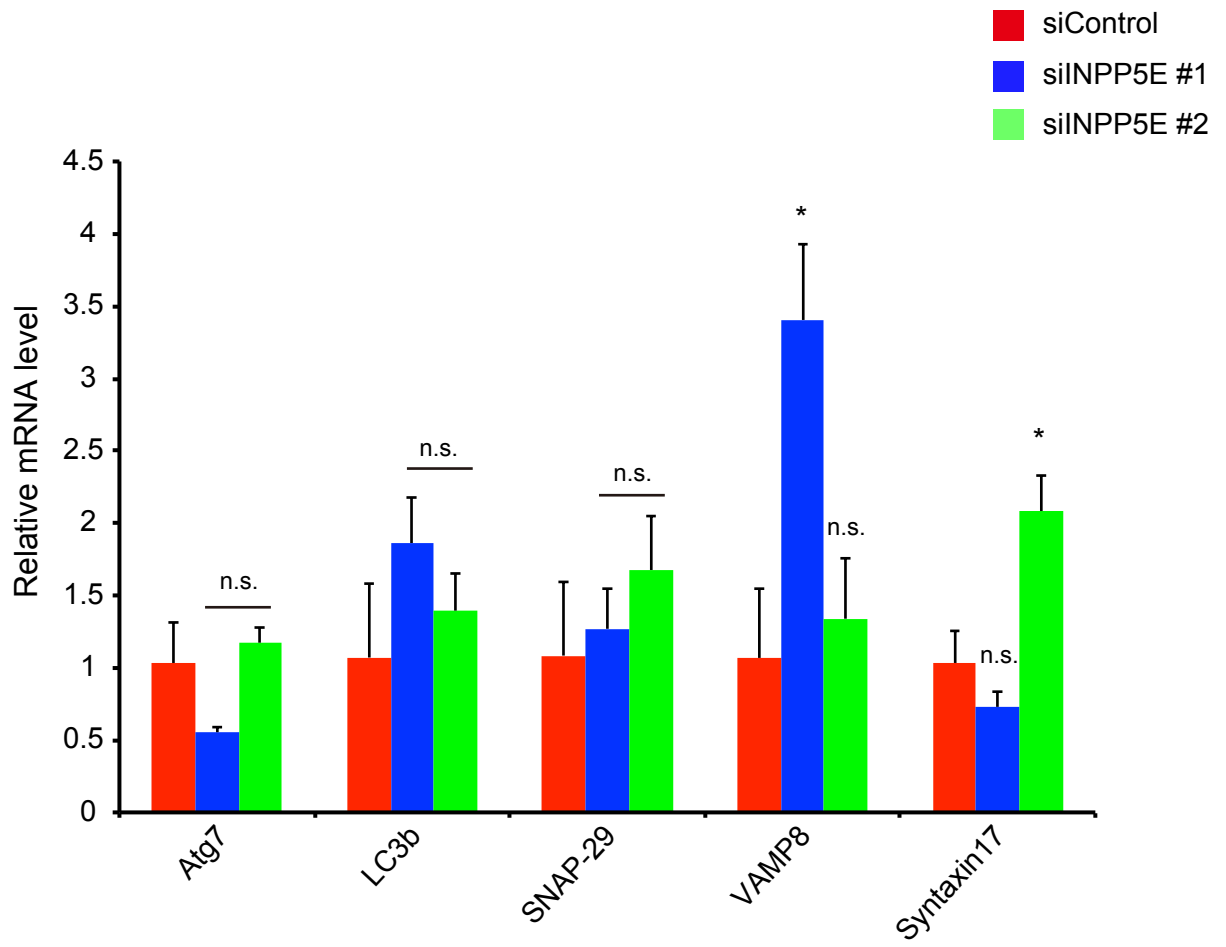



# Appendix Figure S7

## A

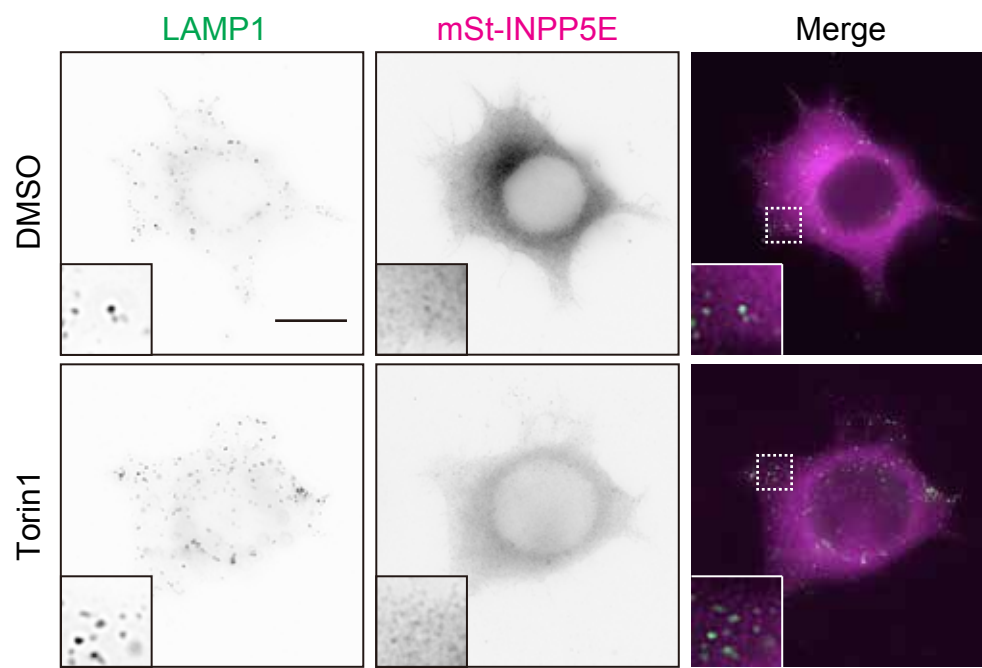

## B

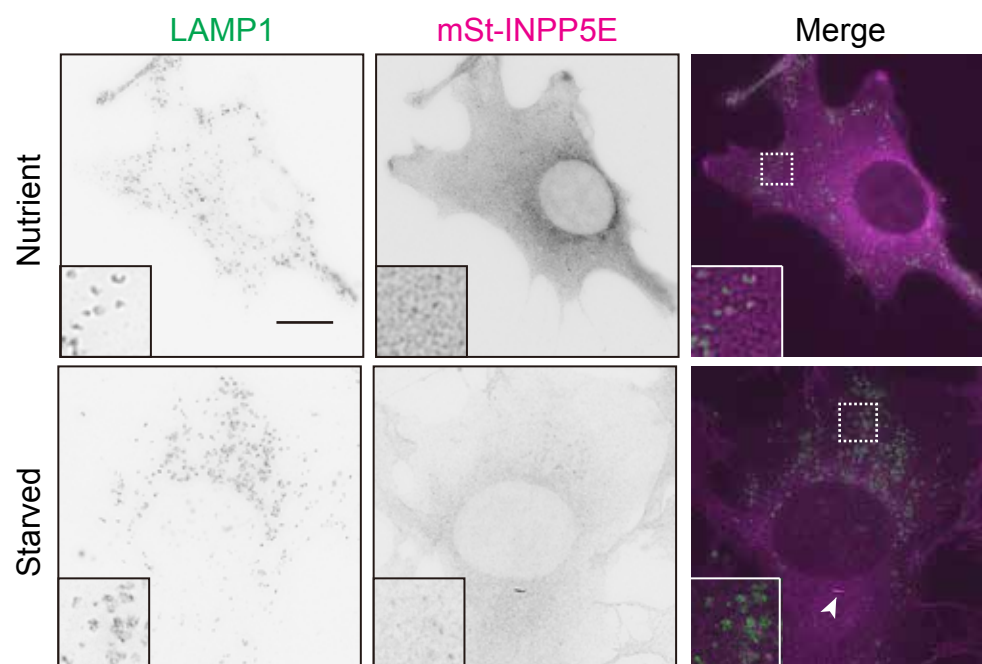

# Appendix Figure S8

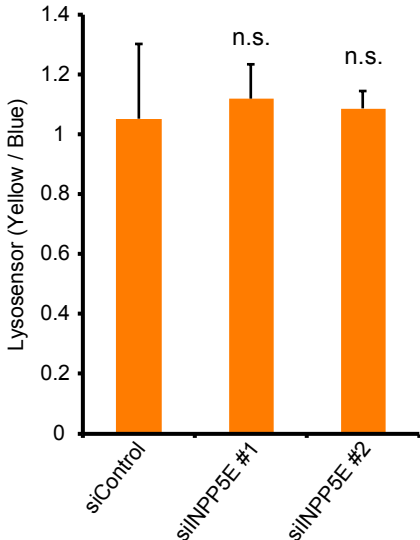

Appendix Figure S9

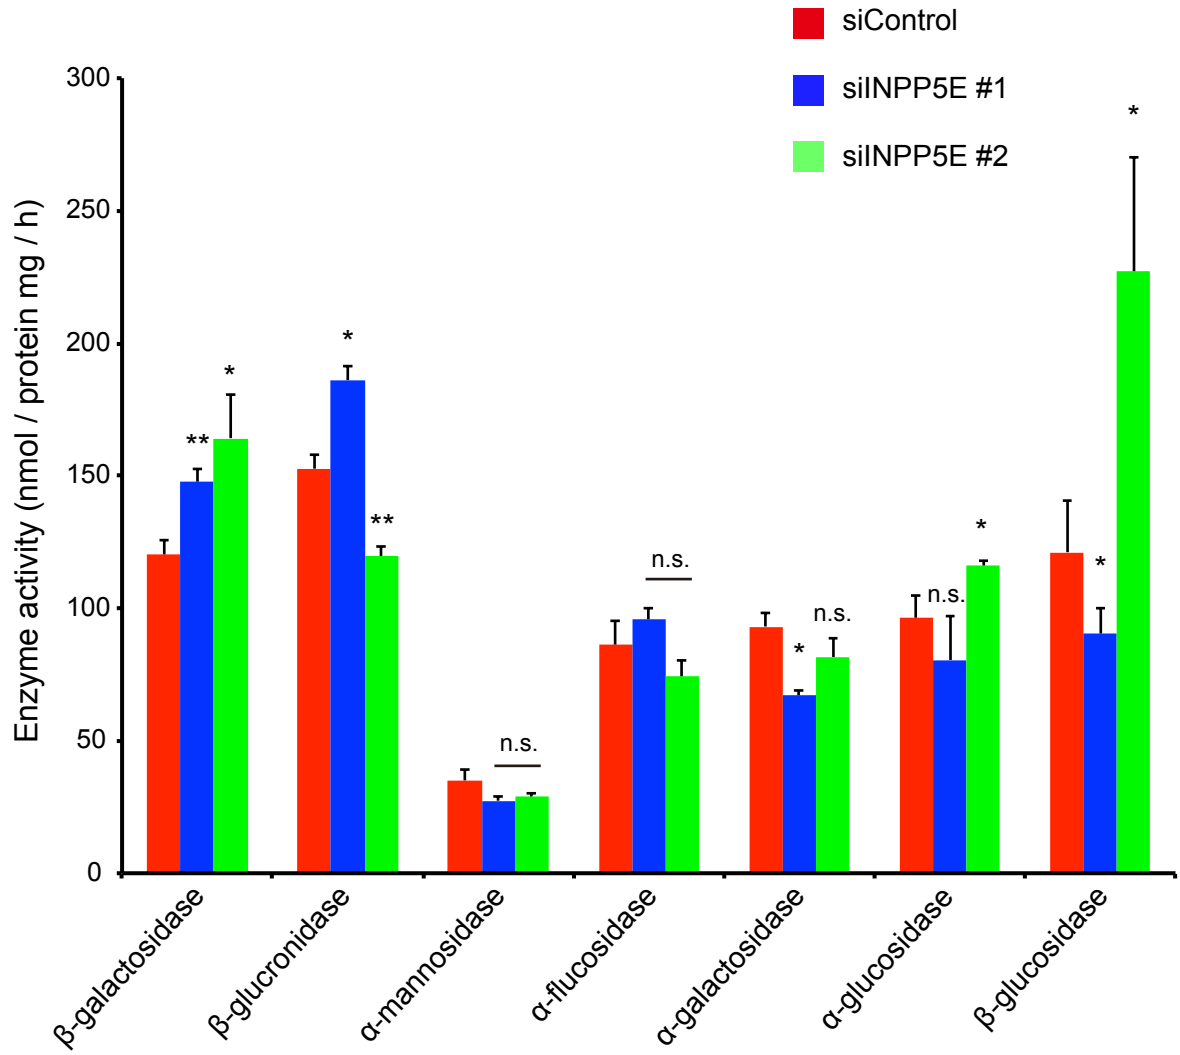

# Appendix Figure S10

A

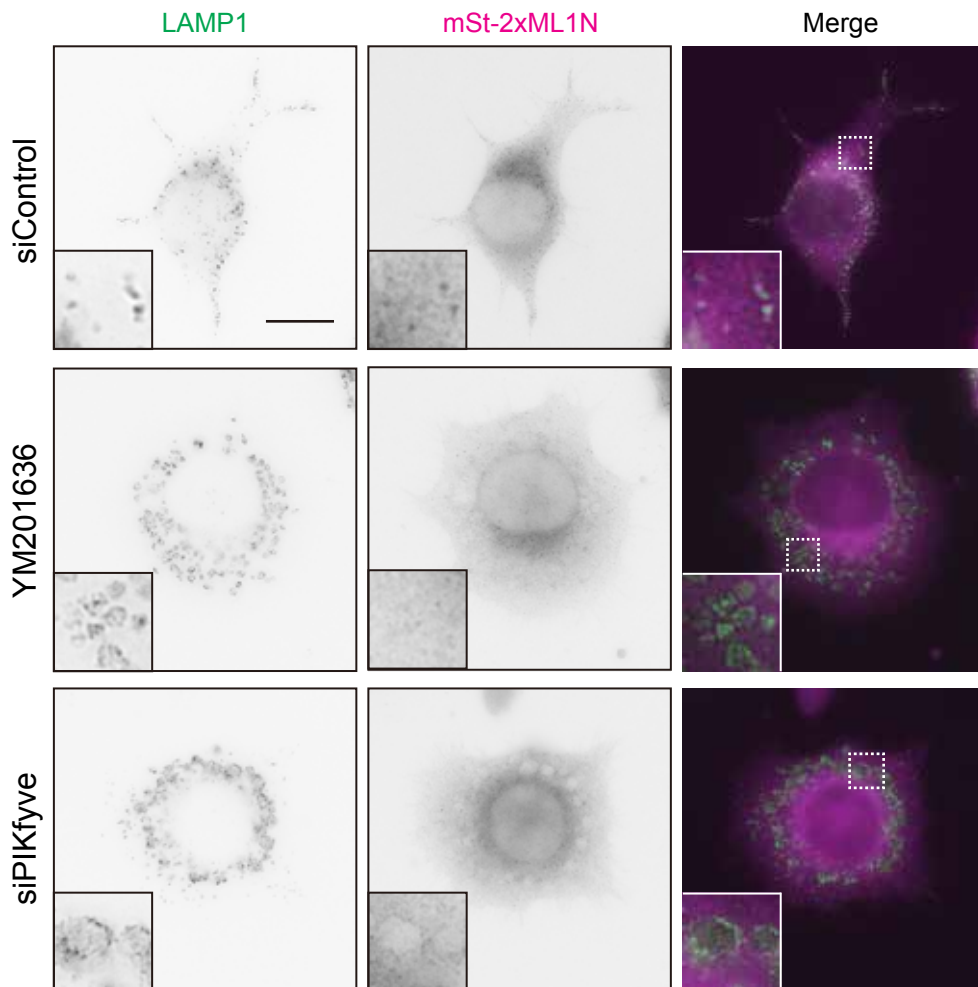

B

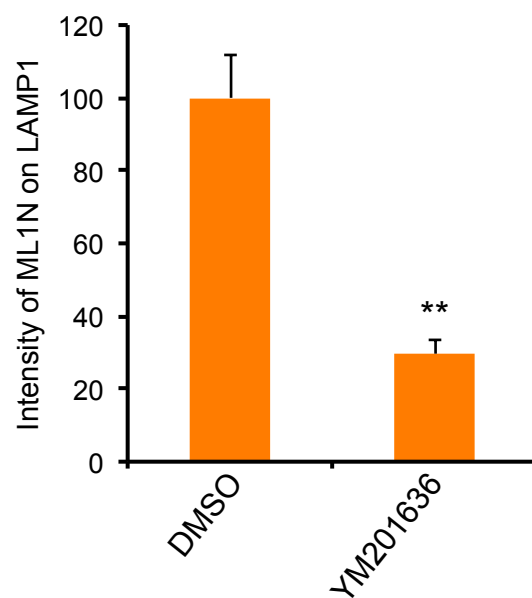

Appendix Figure S11

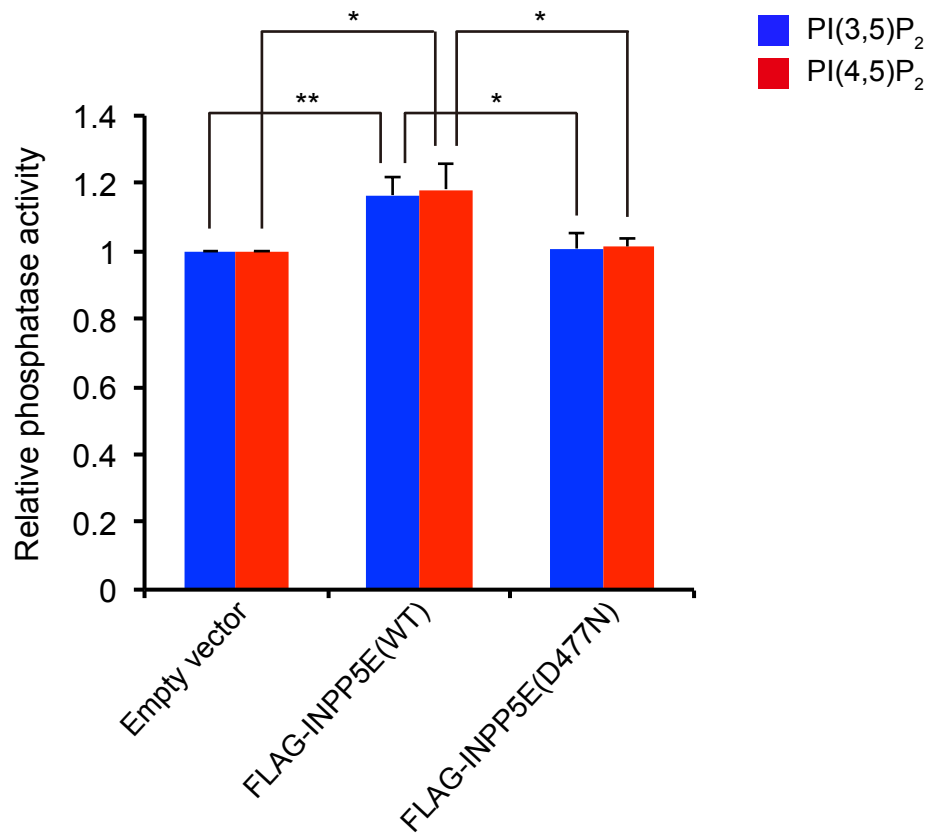

# Appendix Figure S12

## A

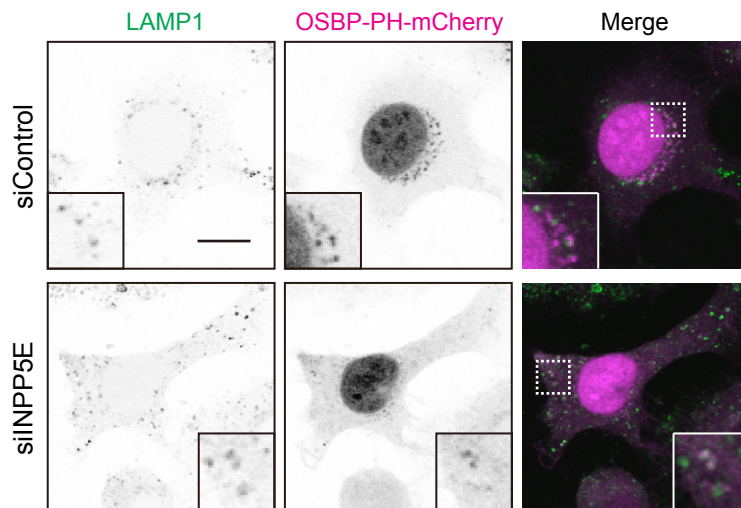

## B

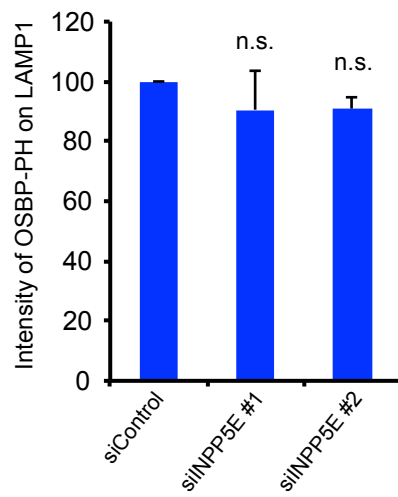

# Appendix Figure S13

## A

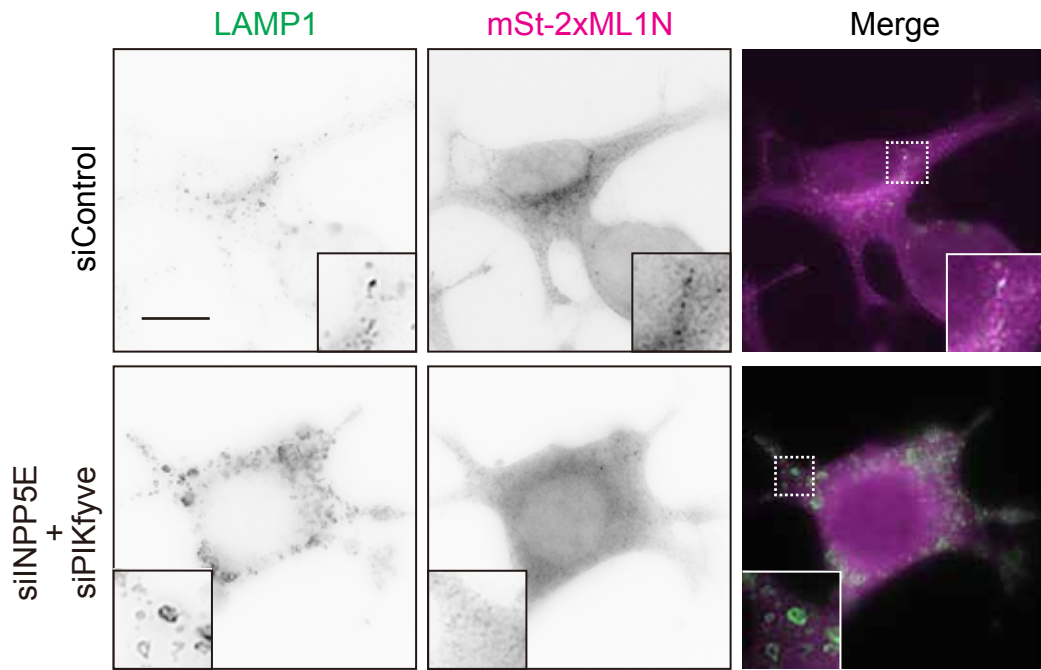

## B

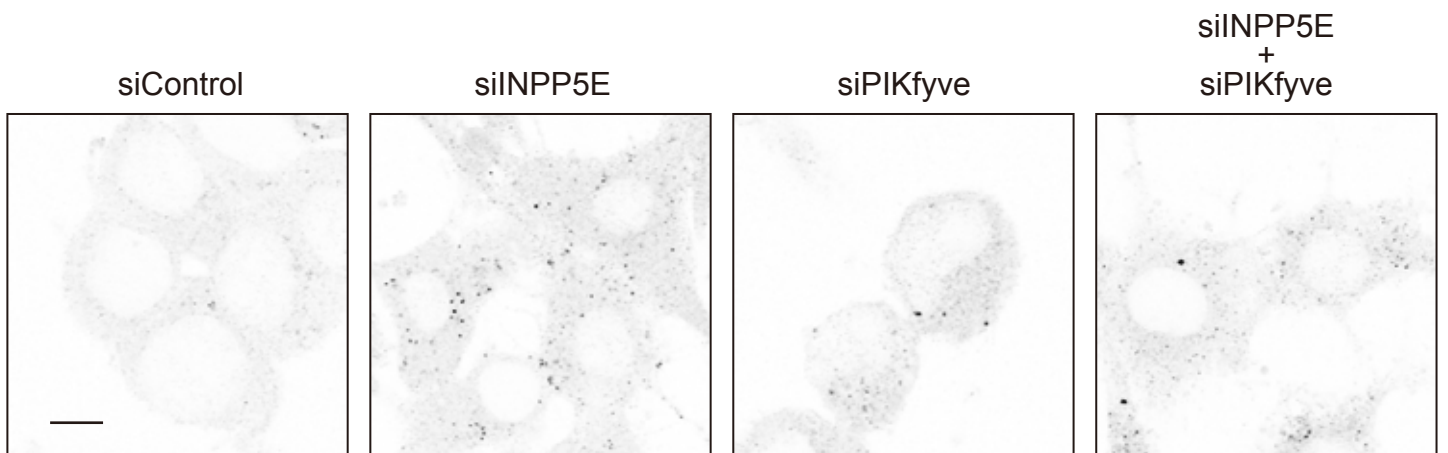

# Appendix Figure S14

## A

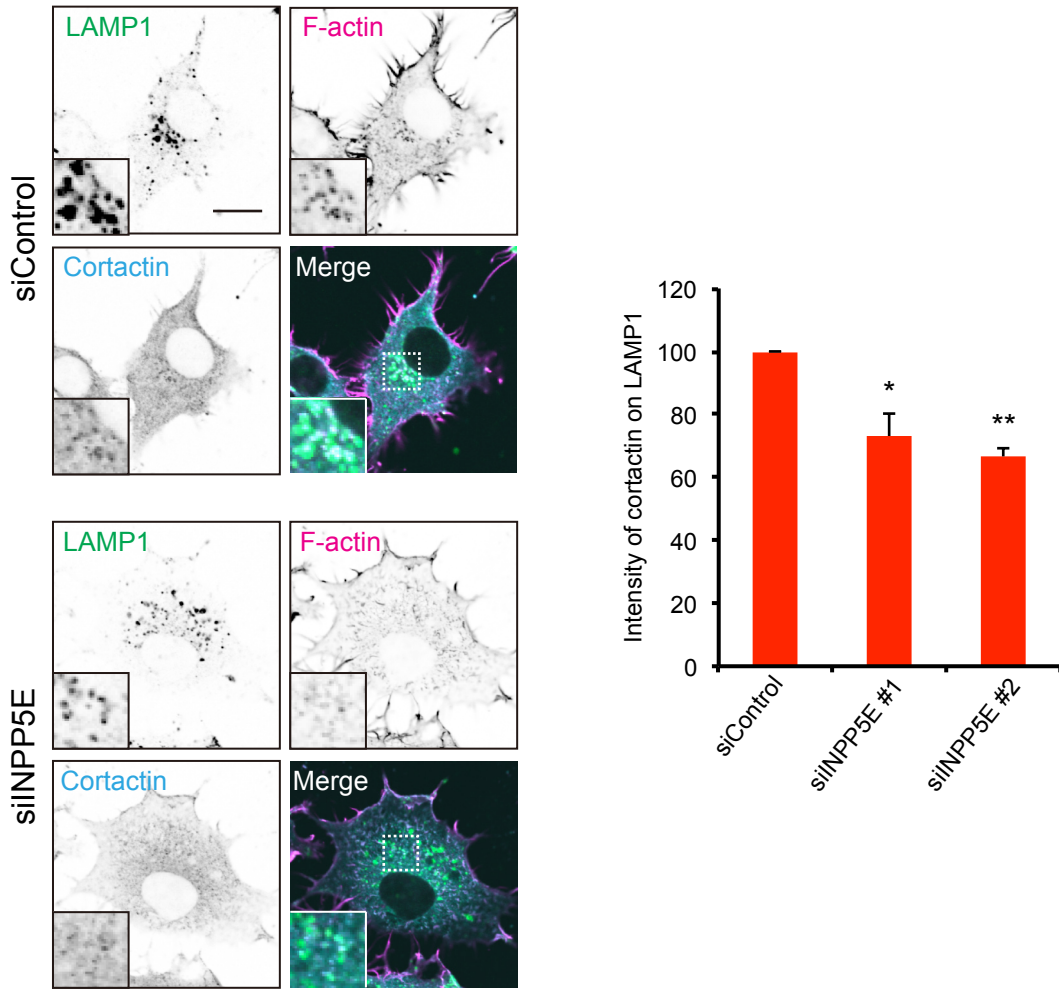

## B

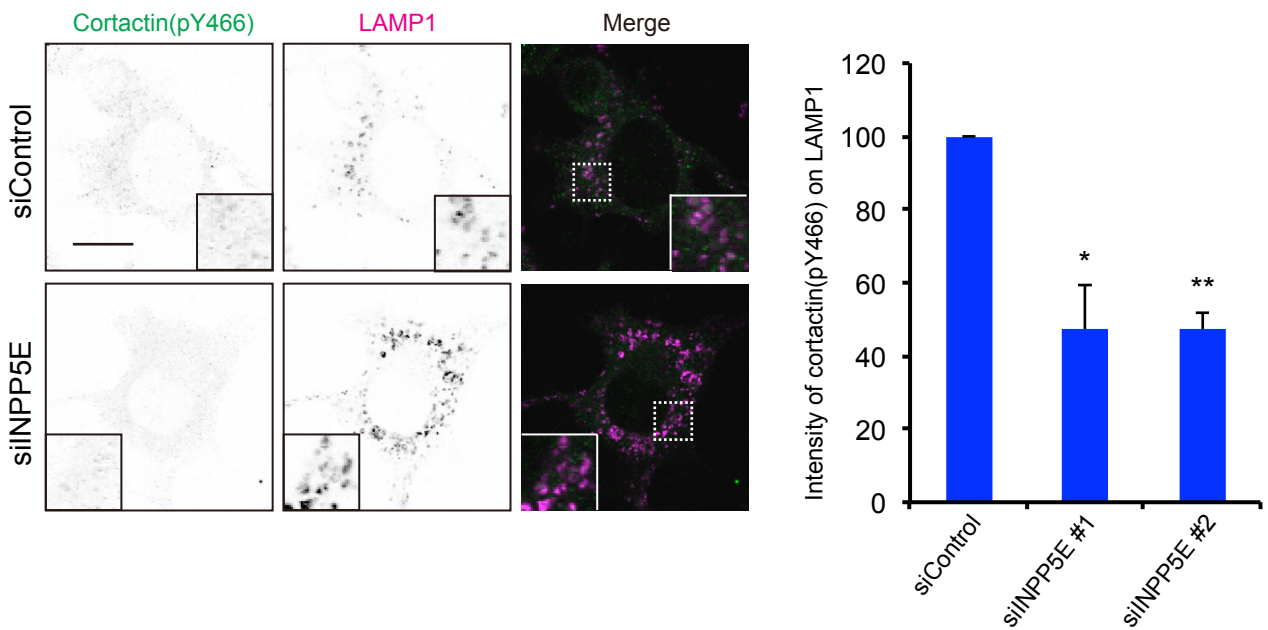

Supplement: EMBJ-35-1853-s001.pdf [file EMBJ-35-1853-s001.pdf]
