# Supplementary material
Source: PubMed Central journal article supplement (PMC5007553)

Figure 1B

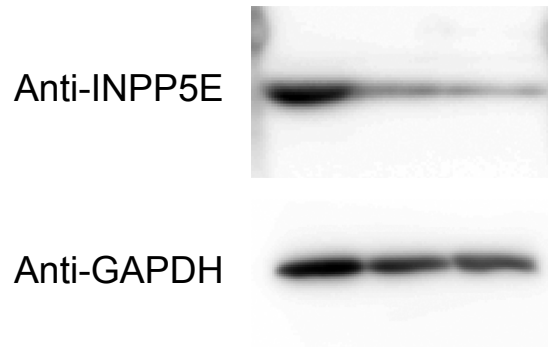

Figure 1C

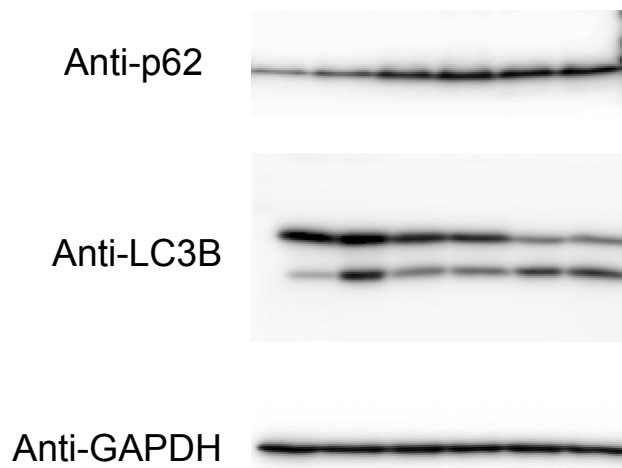

Supplement: EMBJ-35-1853-s002.pdf [file EMBJ-35-1853-s002.pdf]

Figure 2A

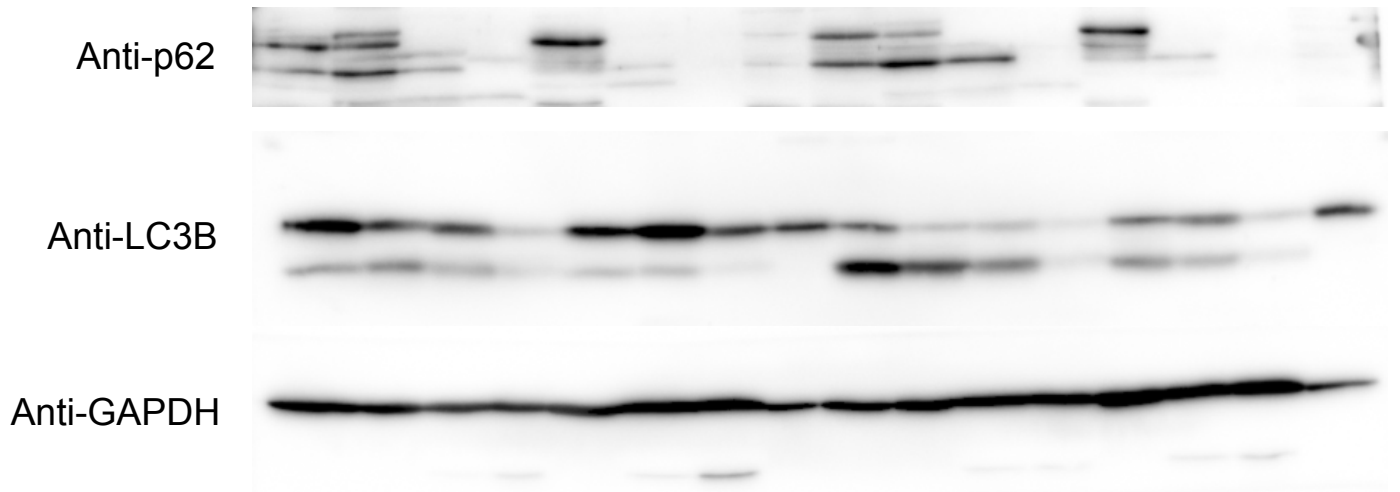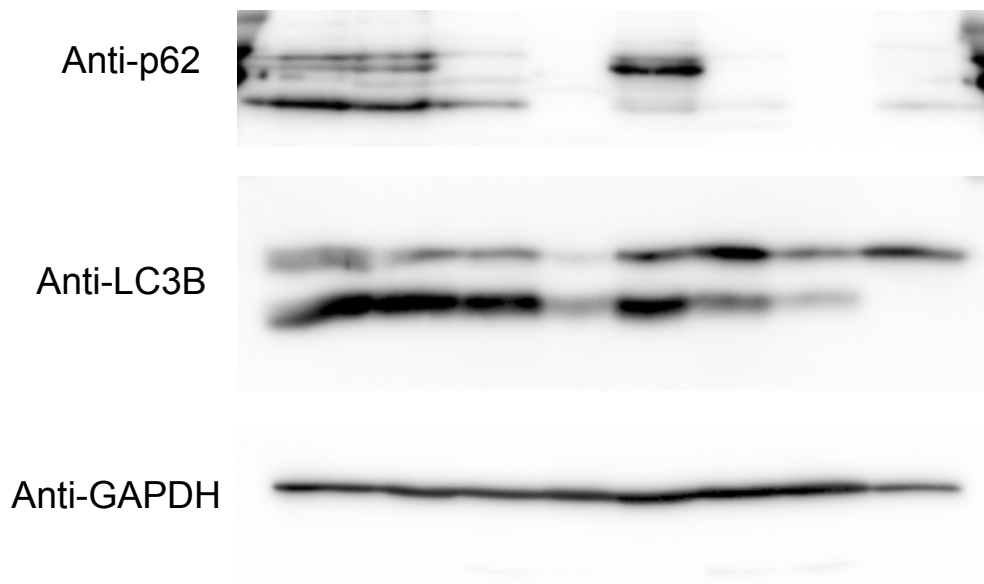

Supplement: EMBJ-35-1853-s003.pdf [file EMBJ-35-1853-s003.pdf]
